# Supplementary material for: The role of environmental calcium in the extreme acid tolerance of northern banjo frog ( Limnodynastes terraereginae ) larvae
Source: Oxford University Press journal article supplement (doi:10.1242/jeb.244376), 2022-06-15
Supplement: jeb244376supp.pdf [file jeb244376supp.pdf]

**Table S1. Primer sequences and accession numbers for 4 key Ca<sup>2+</sup> transport and E-cadherin genes.**

| Gene   | Forward               | Reverse                | Accession number |
|--------|-----------------------|------------------------|------------------|
| CALB1  | GATGGAAAGCTGGGACTTAC  | CATCTATATAGCCACTGCCATC | NW_017306330.1   |
| SLC8a1 | CAAGGAGGGATATGGCAAGA  | ACTTCATGCATGCTGACTGC   | NC_030681.2      |
| PMCA1b | TGGCTTTGCTATGGGTATTG  | GACTGTAAGCTGGAAGTGAAG  | NC_030679.2      |
| TRPV6  | GGAGACGGTGAAAGTTCTGC  | ACAGGCAGCAAAGGAAAGAA   | NC_030736.1      |
| CDH1   | GAAGATGACACTCGGGATAAC | GGTATTTGGGAGCAGACATAA  | NM_001172232.1   |

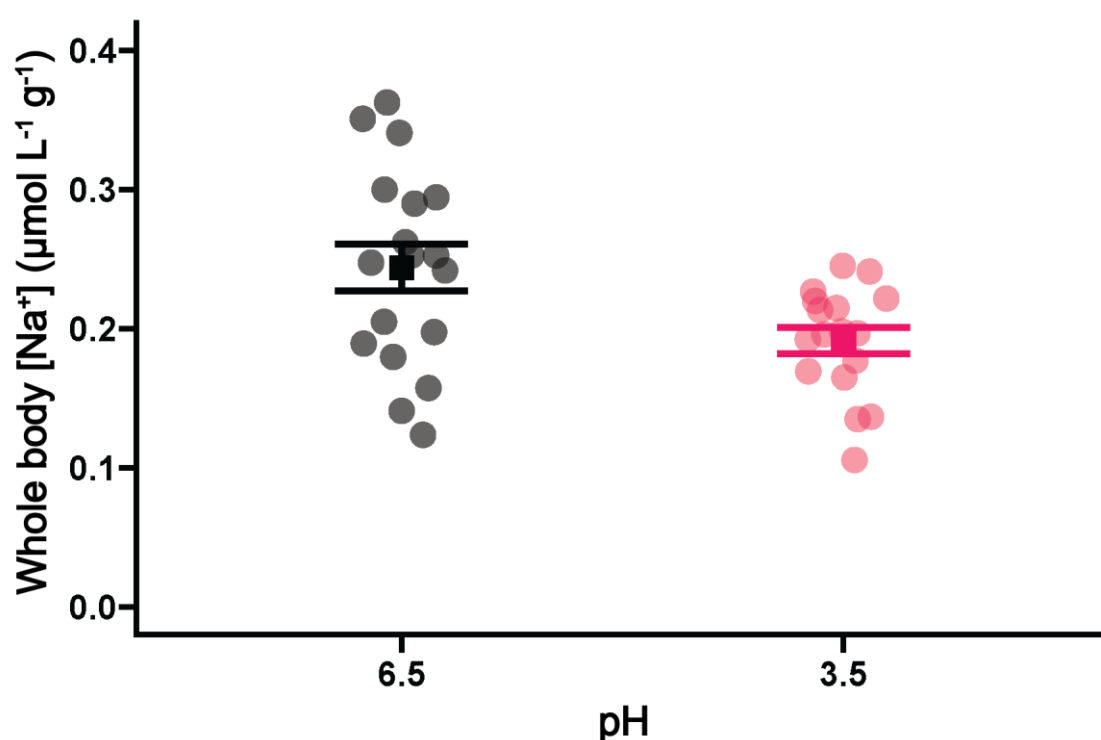

**Fig. S1.** Two-way ANCOVA showed a slight but significant effect of acute exposure to pH 3.5 on *L. terraereginae* larvae on whole body [Na<sup>+</sup>] ( $F_{29,2} = 6.782$ ,  $p = 0.014$ ). No effect of [Ca<sup>2+</sup>]<sub>e</sub> was detected on whole body [Na<sup>+</sup>]. No effect of [Ca<sup>2+</sup>]<sub>e</sub> or exposure pH was detected for whole body [Ca<sup>2+</sup>] (not shown). Squares represent mean values. Error bars represent standard errors.
